# Supplementary material for: Comparing Societal Impact Planning and Evaluation Approaches across Four Urban Living Labs (in Food-Energy-Water Systems)
Source: MDPI journal article supplement (doi:10.3390/su15065387), 2023-03-17
Supplement: s1 [file s1]

Archive with 2 entries (2 files):
- Supplementary Material File S1.pdf
- Supplementary Material File S2.pdf
